# Supplementary material for: CaBi6O10: a novel promising photoanode for photoelectrochemical water oxidation
Source: Royal Society of Chemistry journal article supplement (doi:10.1039/c7ta01875d), 2017-01-01
Supplement: c7ta01875d1.pdf [file c7ta01875d1.pdf]

**Supplementary Information:**

Fig.S1 SEM images of samples (pH 7.0) annealed at (a) 400, (b) 500, (c) 550, and (d) 600°C for 12 h

Fig.S2 UV-Vis absorbance spectra of thick  $\text{CaBi}_6\text{O}_{10}$  NPs films with different thickness obtained at 600 °C for 12 h

Fig.S3 Electrochemical impedance spectroscopy of as-prepared thick  $\text{CaBi}_6\text{O}_{10}$  NPs for 5 cycles, 10 cycles, 15 cycles, and 20 cycles at 600 °C for 12 h

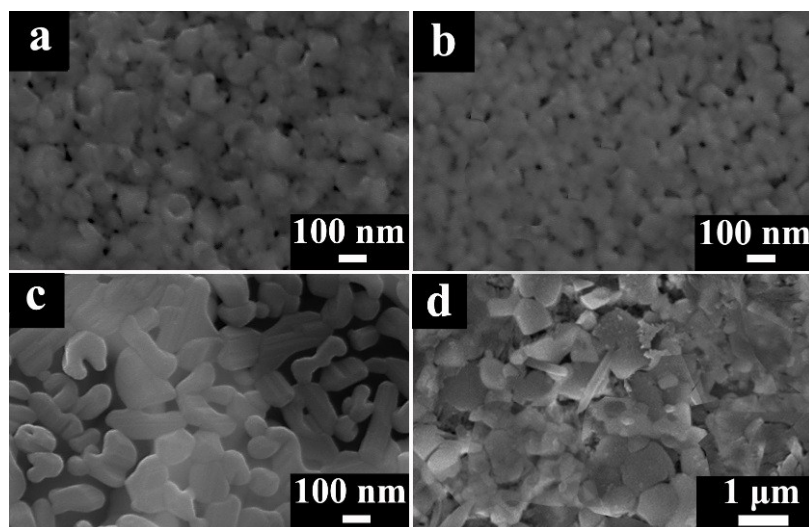

Fig.S1 SEM images of samples (pH 7.0) annealed at (a) 400, (b) 500, (c) 550, and (d) 600°C for 12 h

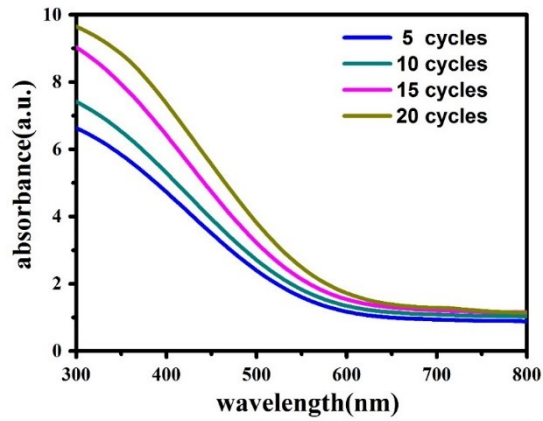

Fig.S2 UV-Vis absorbance spectra of thick  $\text{CaBi}_6\text{O}_{10}$  NPs films with different thickness obtained at  $600\text{ }^\circ\text{C}$  for 12 h

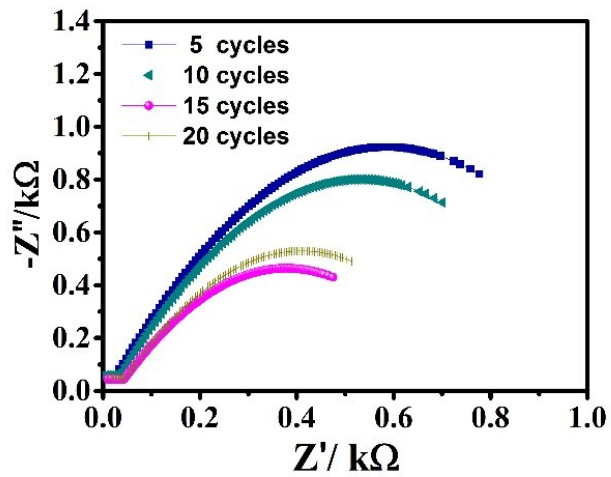

Fig.S3 Electrochemical impedance spectroscopy of as-prepared thick  $\text{CaBi}_6\text{O}_{10}$  NPs for 5 cycles, 10 cycles, 15 cycles, and 20 cycles at  $600\text{ }^\circ\text{C}$  for 12 h
